# Supplementary material for: Machine Learning and Texture Analysis of [18F]FDG PET/CT Images for the Prediction of Distant Metastases in Non-Small-Cell Lung Cancer Patients
Source: MDPI journal article supplement (doi:10.3390/biomedicines12030472), 2024-02-20
Supplement: s1 [file s1]

## SUPPLEMENTARY INFORMATION

**ARTICLE TITLE:** Machine learning and texture analysis of [<sup>18</sup>F]FDG PET/CT images for the prediction of distant metastases in non-small-cell lung cancer patients.

**AUTHOR NAMES:** Armin Hakkak Moghadam Torbati<sup>1+</sup>, Sara Pellegrino<sup>1+</sup>, Rosa Fonti<sup>1</sup>, Rocco Morra<sup>2</sup>, Sabino De Placido<sup>2</sup>, Silvana Del Vecchio<sup>1\*</sup>.

<sup>1</sup>Department of Advanced Biomedical Sciences, University of Naples "Federico II", Naples, Italy.

<sup>2</sup>Department of Clinical Medicine and Surgery, University of Naples "Federico II", Naples, Italy.

+ These authors contributed equally to this work

**\*CORRESPONDENCE:** Prof. Silvana Del Vecchio, Via Sergio Pansini 5, 80131 Naples, Italy; phone +390817463307; Fax: +390815457081, e-mail: delvecc@unina.it

**Supplementary Table S1.** Conventional and texture features derived from [<sup>18</sup>F]FDG PET/CT images by using LIFEx software

| FEATURES                                                                                                                     |                                                                                                                                             |                                                      |                                                                                                                                                        |
|------------------------------------------------------------------------------------------------------------------------------|---------------------------------------------------------------------------------------------------------------------------------------------|------------------------------------------------------|--------------------------------------------------------------------------------------------------------------------------------------------------------|
| SHAPE                                                                                                                        | HISTOGRAM                                                                                                                                   | DERIVED FROM CONVENTIONAL                            | CONVENTIONAL                                                                                                                                           |
| SHAPE Sphericity<br>SHAPE Compacity<br>SHAPE Volume                                                                          | HISTO_Skewness<br>HISTO_Kurtosis<br>HISTO_Entropy-log <sub>10</sub><br>HISTO_Energy                                                         | CoV (SD/SUVmean)                                     | SUVmin<br>SUVmax<br>SUVmean<br>SD mean<br>SUVpeak<br>MTV<br>TLG                                                                                        |
| GLCM                                                                                                                         | GLRM                                                                                                                                        | NGLDM                                                | GLZLM                                                                                                                                                  |
| GLCM_Homogeneity<br>GLCM_Energy<br>GLCM_Contrast<br>GLCM_Correlation<br>GLCM_Entropy-log <sub>10</sub><br>GLCM_Dissimilarity | GLRM_SRE<br>GLRM_LRE<br>GLRM_LGRE<br>GLRM_HGRE<br>GLRM_SRLGE<br>GLRM_SRHGE<br>GLRM_LRLGE<br>GLRM_LRHGE<br>GLRM_GLNU<br>GLRM_RLNU<br>GLRM_RP | NGLDM_Coarseness<br>NGLDM_Contrast<br>NGLDM_Busyness | GLZLM_SZE<br>GLZLM_LZE<br>GLZLM_LGZE<br>GLZLM_HGZE<br>GLZLM_SZLGE<br>GLZLM_SZHGE<br>GLZLM_LZLGE<br>GLZLM_LZHGE<br>GLZLM_GLNU<br>GLZLM_ZLNU<br>GLZLM_ZP |

**Supplementary Table S2.** Accuracy of models using SVM method in the training dataset

|              | Number of combined features |                    |                      |                     |                     |
|--------------|-----------------------------|--------------------|----------------------|---------------------|---------------------|
| Lasso method | First feature               | Two first features | Three first features | Four first features | Five first features |
| Fscchi2      | 81.1                        | 78.3               | 81.1                 | 83.7                | 83.7                |
| Fscmrnr      | 75                          | 73                 | 75                   | 71.4                | 78                  |
| Fscnca       | 75                          | 73.1               | 78.4                 | 79                  | -                   |
| Fsrftest     | 81.1                        | 78.3               | 81.1                 | 83.7                | 83.7                |
| Fsrnca       | 75                          | 73.1               | 78.4                 | 79                  | -                   |
| Fsulaplacian | 77.2                        | 74                 | 79                   | 83.7                | 81.1                |
| Relieff      | 75                          | 72.1               | 80.5                 | 78                  | 83.7                |

**Supplementary Table S3.** Accuracy of models using SVM method in the final testing dataset

|              | Number of combined features |                    |                      |                     |                     |
|--------------|-----------------------------|--------------------|----------------------|---------------------|---------------------|
| Lasso method | First feature               | Two first features | Three first features | Four first features | Five first features |
| Fscchi2      | 48                          | 46.4               | 50.5                 | 45                  | 51.3                |
| Fscmrnr      | 40                          | 47                 | 42                   | 49                  | 47                  |
| Fscnca       | 49                          | 45.3               | 44                   | 50.9                | -                   |
| Fsrftest     | 48                          | 46.4               | 50.5                 | 45                  | 51.3                |
| Fsrnca       | 49                          | 45.3               | 44                   | 50.9                | -                   |
| Fsulaplacian | 49                          | 43                 | 47.2                 | 49.3                | 50.9                |
| Relieff      | 47                          | 49                 | 45.3                 | 51                  | 49.4                |
